# Supplementary material for: TET2 is a component of the estrogen receptor complex and controls 5mC to 5hmC conversion at estrogen receptor cis-regulatory regions
Source: PubMed Central journal article supplement — Cell Rep. 2021 Feb 23;34(8):108776. doi: 10.1016/j.celrep.2021.108776 (PMC7921846; doi:10.1016/j.celrep.2021.108776), 2021-02-23
Supplement: mmc1.pdf [file mmc1.pdf]

**Supplemental information**

**TET2 is a component of the estrogen receptor complex and controls 5mC to 5hmC conversion at estrogen receptor *cis*-regulatory regions**

**Rebecca Broome, Igor Chernukhin, Stacey Jamieson, Kamal Kishore, Evangelia K. Papachristou, Shi-Qing Mao, Carmen Gonzalez Tejedo, Areeb Mahtey, Vasiliki Theodorou, Arnoud J. Groen, Clive D'Santos, Shankar Balasubramanian, Anca Madalina Farcas, Rasmus Siersbæk, and Jason S. Carroll**

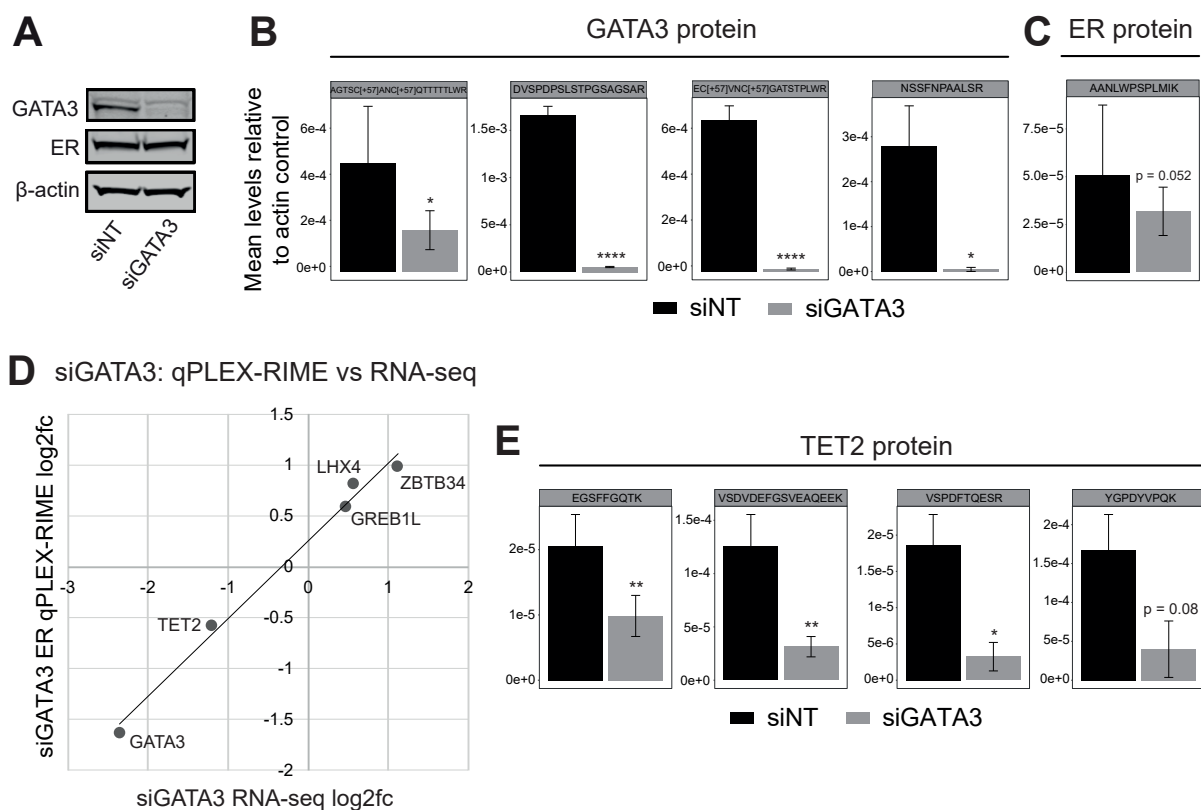

**Figure S1. Western blot and PRM confirm effective GATA3 knockdown, and RNA-seq demonstrates that proteomic changes to the ER complex are paralleled at the RNA level for all significantly altered targets, and additionally at the protein level for TET2 (related to Figure 1).**

A) Western blot for GATA3 and ER after 48 hours' treatment with either non-targeting control siRNA (siNT) or siRNA targeting GATA3 (siGATA3), demonstrating robust GATA3 depletion with no effect on total ER levels.  $\beta$ -actin is used as a loading control. B) PRM results showing levels of different GATA3 peptides or C) the single ER peptide detected, respectively, in response to siNT or siGATA3 treatment (48 hours). D) Correlation between log2 fold change values obtained for selected targets in ER qPLEX-RIME versus RNA-seq upon GATA3 knockdown. E) PRM results showing levels of different TET2 peptides in response to siNT or siGATA3 treatment (48 hours). All PRM results represent mean  $\pm$  SD peptide levels relative to an actin control (n = 3). \*\* =  $p \leq 0.01$ , \*\*\*\* =  $p \leq 0.0001$ .

## A RIME coverage diagrams

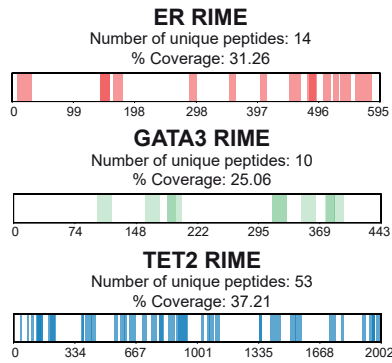

## B RIME % coverage and unique peptides

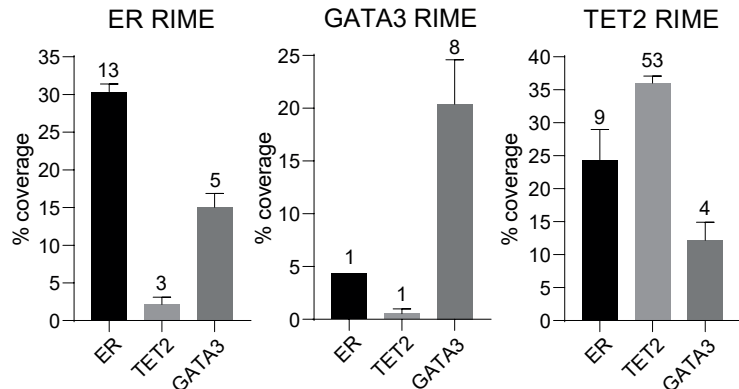

## C

### ER, TET2 and GATA3 common interactors from RIME

|         |         |           |          |         |         |          |         |
|---------|---------|-----------|----------|---------|---------|----------|---------|
| ACIN1   | DAZAP1  | GATA3     | LUC7L    | PRDX1   | RPL17   | SF3B4    | TKT     |
| ACP1    | DBR1    | GATAD2B   | LUC7L2   | PRKDC   | RPL21   | SLC9A3R1 | TLE1    |
| ACTC1   | DCAF7   | GMPS      | LUC7L3   | PRMT1   | RPL22   | SLTM     | TLE3    |
| ADAR    | DDB1    | GRB2      | MATR3    | PRMT6   | RPL24   | SMARCA4  | TLK2    |
| AES     | DDX1    | GREB1     | MBNL2    | PRPF19  | RPL27   | SMARCB1  | TMPO    |
| AHCY    | DDX17   | GRHL2     | MCM3     | PRPF3   | RPL3    | SMARCC1  | TNPO1   |
| AHDC1   | DDX21   | GTF2I     | MCM7     | PRPF31  | RPL34   | SMARCC2  | TPM4    |
| AKAP8   | DDX23   | H1FO      | MEMO1    | PRPF38B | RPL35   | SMARCD2  | TPR     |
| AKAP8L  | DDX39B  | H2AFY     | MFAP1    | PRPF4   | RPL35A  | SMARCE1  | TRA2A   |
| API5    | DDX3X   | H2AFZ     | MLF2     | PRPF6   | RPL4    | SMC1A    | TRA2B   |
| ARF3    | DDX42   | HDAC2     | MOV10    | PRPF8   | RPL6    | SMU1     | TRIM24  |
| ARGLU1  | DDX46   | HIST1H2AB | MTA2     | PSPC1   | RPL7    | SNRNP200 | TRIM25  |
| ARID1A  | DDX5    | HIST1H2BJ | MYEF2    | PTBP1   | RPRD2   | SNRNP40  | TRIM28  |
| ARID1B  | DDX6    | HIST1H3A  | MYH14    | PTBP3   | RPS10   | SNRPA1   | TRIM33  |
| ARL6IP4 | DHX15   | HMCE5     | MYH9     | PUF60   | RPS11   | SNRPB    | TRIP6   |
| BCL9L   | DKC1    | HMGB2     | MYL6     | QKI     | RPS13   | SNRPD1   | TRPS1   |
| BCLAF1  | DNAJA1  | HMGB3     | NACC1    | RACK1   | RPS14   | SNRPD2   | TUBB    |
| BOLA2   | DNAJB1  | HNRNPA0   | NAT10    | RAI1    | RPS15   | SNRPE    | U2AF1   |
| BUB3    | DYNLL1  | HNRNPAB   | NCBP1    | RALY    | RPS15A  | SNW1     | U2AF2   |
| CARM1   | EEF1D   | HNRNPC    | NCBP2    | RAN     | RPS16   | SRRM1    | U2SURP  |
| CBX3    | EEF2    | HNRNPD    | NCOA3    | RARA    | RPS2    | SRRM2    | UBAP2L  |
| CBX5    | EFTUD2  | HNRNPDL   | NCOA5    | RBBP7   | RPS20   | SRRT     | UBC     |
| CCAR1   | EIF3I   | HNRNPF    | NCOR1    | RBM10   | RPS21   | SRSF1    | UGDH    |
| CCAR2   | EIF4A1  | HNRNPH2   | NCOR2    | RBM12   | RPS24   | SRSF10   | UPF1    |
| CDC5L   | EIF4A3  | HNRNPH3   | NKRF     | RBM12B  | RPS25   | SRSF5    | USP39   |
| CEBPB   | EIF4B   | HNRNPL    | NMD3     | RBM14   | RPS27   | SRSF6    | XPO1    |
| CELF1   | EIF4H   | HNRNPLL   | NONO     | RBM15   | RPS28   | SRSF7    | XRCC5   |
| CFL1    | EIF5A   | HNRNPM    | NOP58    | RBM22   | RPS3A   | SRSF9    | XRCC6   |
| CHERP   | ELAVL1  | HNRNPR    | NR2F2    | RBM25   | RPS4X   | SSB      | XRN2    |
| CIRBP   | ENO1    | HNRNPU    | NRIP1    | RBM3    | RPS7    | SSRP1    | YLPM1   |
| CLIC3   | ERH     | HNRNPUL1  | NUDT16L1 | RBM33   | RPS9    | STARD10  | YTHDF2  |
| CLK3    | ESR1    | HNRNPUL2  | NUDT21   | RBM39   | RSRC2   | STAT3    | YWHAQ   |
| CLTC    | ESRP1   | HSP90AA1  | NUMA1    | RBM4    | RTCB    | STAU1    | ZC3H11A |
| CPNE3   | ESRP2   | HSPA1B    | NXF1     | RBM45   | RTFDC1  | STRBP    | ZC3H14  |
| CPSF1   | FAM120A | HSPA8     | OGT      | RBM4B   | RXRA    | SUB1     | ZC3H18  |
| CPSF6   | FAM50A  | ILF2      | PA2G4    | RBM8A   | S100A11 | SUMO1P1  | ZC3H4   |
| CPSF7   | FAM98B  | KDM1A     | PABPC1   | RBMX    | SAFB    | SUPT16H  | ZFR     |
| CREBBP  | FASN    | KHDRBS1   | PABPN1   | RBPMS   | SAFB2   | SUPT5H   | ZNF207  |
| CRIP2   | FEN1    | KHSRP     | PARP1    | RCC1    | SARNP   | SYNCRIP  | ZNF217  |
| CRNKL1  | FIP1L1  | KPNA2     | PCBP1    | RCC2    | SART1   | TAF15    | ZNF281  |
| CSDE1   | FOSL2   | KRT14     | PCBP2    | RNF20   | SART3   | TAGLN2   | ZNF326  |
| CSE1L   | FOXA1   | L1RE1     | PDCD6    | RNF40   | SBNO2   | TBL1XR1  | ZNF385A |
| CSNK1A1 | FUBP1   | LARP4     | PFN1     | RNH1    | SET     | TBX2     | ZNF638  |
| CSTF1   | FUBP3   | LASP1     | PFN2     | RPL10   | SF1     | TCERG1   |         |
| CSTF2   | FUS     | LGALS3    | PIAS3    | RPL13   | SF3A3   | TCF20    |         |
| CSTF3   | FXR1    | LMNA      | PKM      | RPL13A  | SF3B1   | TET2     |         |
| CTBP1   | G3BP1   | LMNB1     | POLDIP3  | RPL14   | SF3B2   | THRAP3   |         |
| CTBP2   | GAPDH   | LMX1B     | PPIA     | RPL15   | SF3B3   | TIAL1    |         |

**Figure S2. ER, GATA3 and TET2 are detected as reciprocal interactors of one another using RIME, and share a large number of common interactors (related to Figure 1).** A) Non-quantitative RIME in MCF7 cells yielded robust coverage of the three bait proteins ER, GATA3 and TET2, indicated by coverage diagrams showing the unique peptides identified with high confidence across the protein sequence. The number of unique peptides and corresponding % sequence coverage is shown above each plot. Each diagram provides a representative example of three biological replicates. B) Barplots depicting the % peptide sequence coverage for ER, GATA3 and TET2 in separate RIME experiments, indicating that these three proteins are reciprocally detected as interactors of one another using RIME. Results represent mean  $\pm$  SD ( $n = 3$ ). The number of unique peptides detected for each protein (the average of three biological replicates) is indicated above each bar. C) Full list of ER/GATA3/TET2 common interactors. Specific interactors were considered as those occurring in at least two out of three independent replicates. Any proteins that appeared in any one of three IgG negative control RIME experiments were excluded.

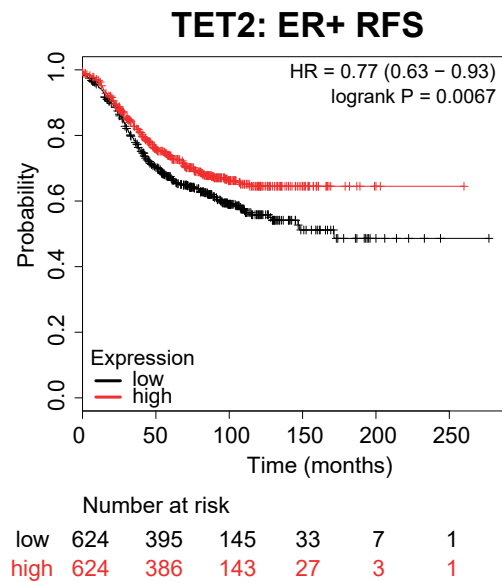

**Figure S3. Higher TET2 mRNA expression is associated with improved relapse-free survival in ER+ breast cancer (related to Figure 2).** Kaplan-Meier plotter-generated plot (Györfy et al. 2013) demonstrating relapse-free survival (RFS) in patients with high versus low TET2 mRNA expression. HR = hazard ratio.

**A** Gene expression changes after TET2 knockdown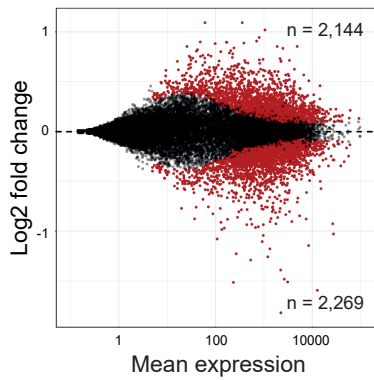**B** Gene expression changes after ER knockdown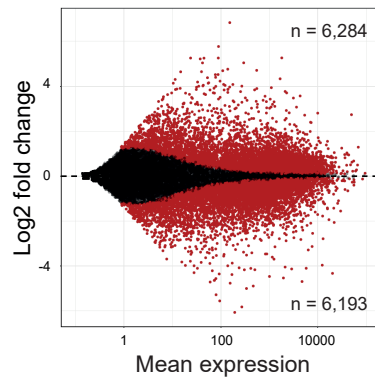**C** Gene expression changes after GATA3 knockdown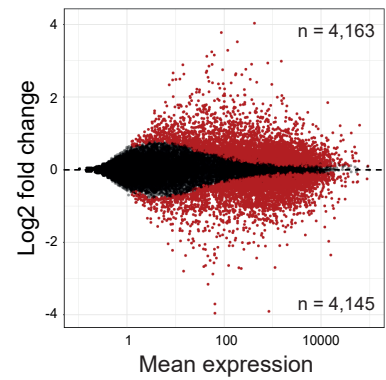**D** TET2 protein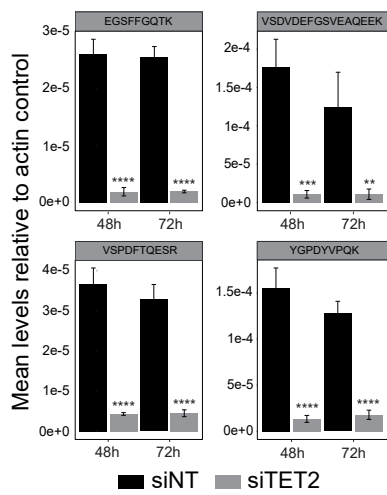**E** ER protein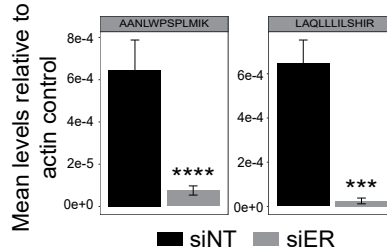**F** GATA3 protein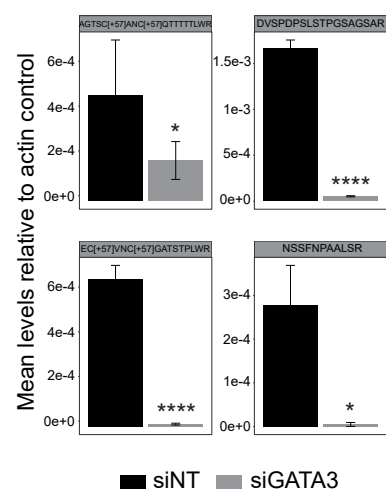**G** TET2 protein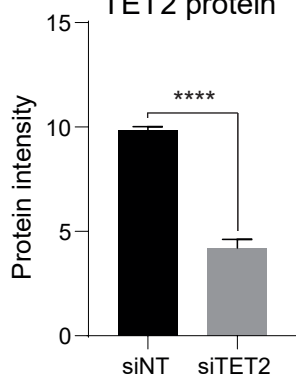**H** ER protein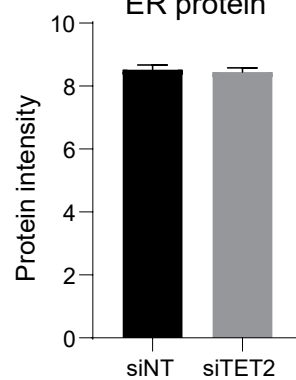**I** GATA3 protein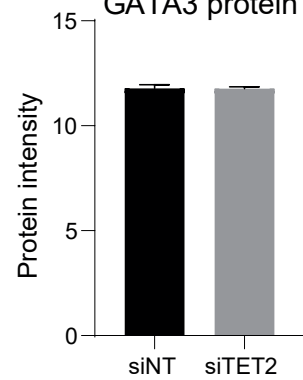

**Figure S4. Individual knockdown of TET2, ER and GATA3 affects gene expression in MCF7 cells, with the extent of depletion of each target protein confirmed using PRM. TET2 knockdown does not affect total ER or GATA3 protein levels according to whole proteome analysis (related to Figures 3 and 4).** MA plots demonstrating gene expression changes in response to either A) siTET2, B) siER or C) siGATA3 treatment (48 hours) in MCF7 cells (n = 6). Regulated genes according to  $p \leq 0.05$  are highlighted in red, with the corresponding number of genes indicated. Barplots in D), E) and F) depict protein-level validation of each knockdown using PRM, with each plot indicating an individual unique peptide. All PRM results represent mean  $\pm$  SD peptide levels relative to an actin control (n = 3). \*\* =  $p \leq 0.01$ , \*\*\*\* =  $p \leq 0.0001$ . G), H) and I) Selected results from whole proteome analysis showing TET2 (G), ER (H) and GATA3 (I) levels in response to siNT or siTET2 treatment (72 hours). Four replicates of each condition were included in an 11plex TMT MS run. Results represent mean  $\pm$  SD protein intensity, which is the aggregate of intensities of the individual unique peptides identified for each protein. \*\*\*\* =  $p \leq 0.0001$ .

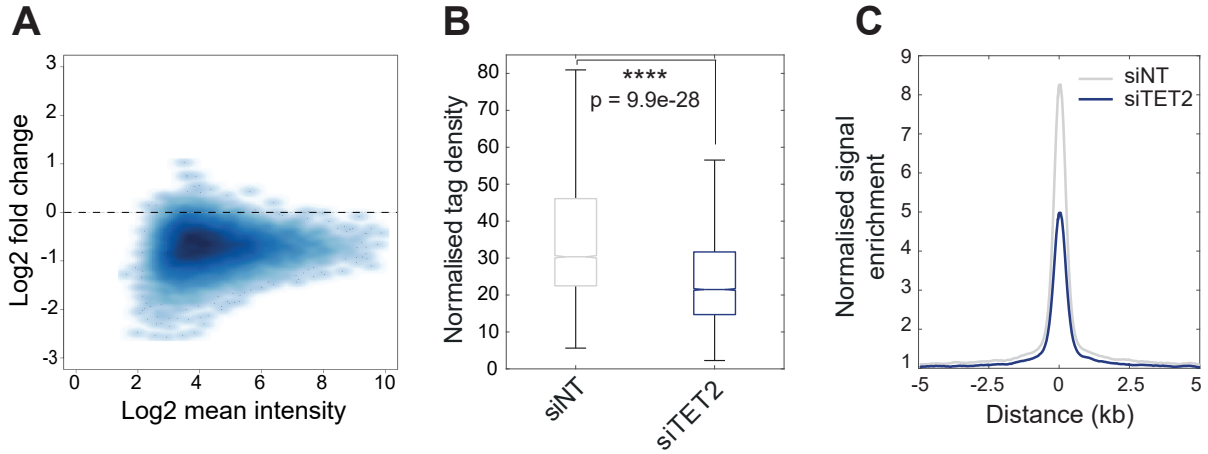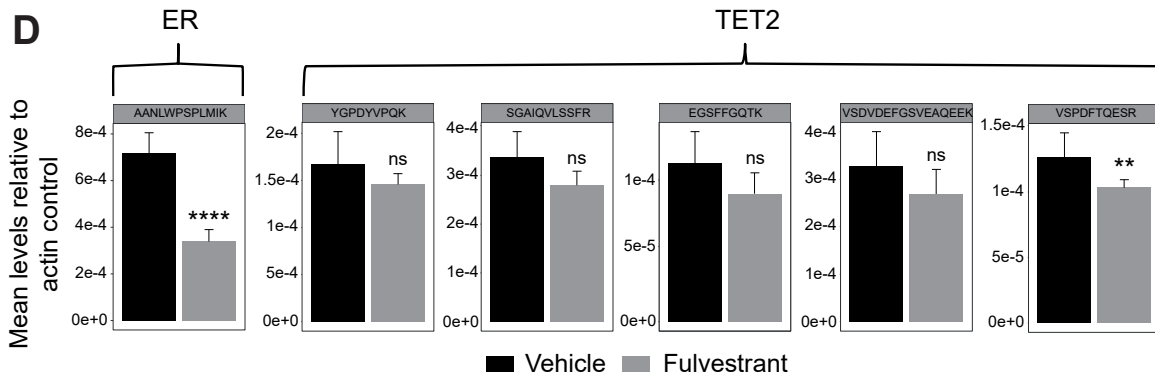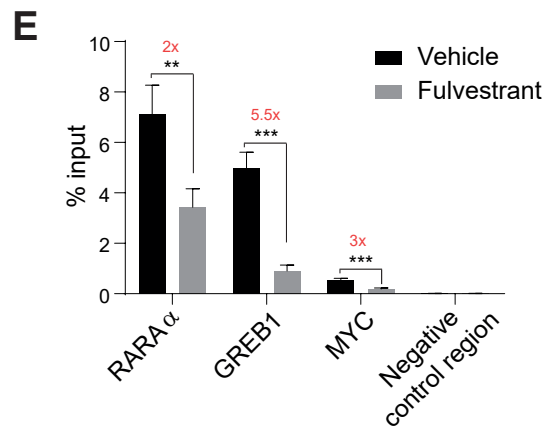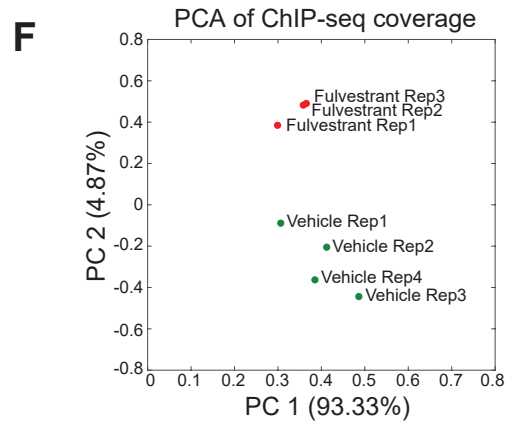



**Figure S5. TET2 knockdown depletes global TET2 binding, validating the TET2 antibody (related to Figures 1, 2 and 4). Acute fulvestrant treatment significantly depletes ER protein levels concurrent with a reduction in ER chromatin occupancy at key ER enhancers, but does not dramatically impact TET2 total protein levels (related to Figure 4).** A) MA plot showing log<sub>2</sub> fold change in TET2 binding in control (siNT) versus TET2 knockdown (siTET2) conditions against log<sub>2</sub> mean intensity of ChIP-seq signal for all TET2 sites (12,728 peaks). B) Boxplot showing the normalised tag density of TET2 ChIP-seq signal in siNT and siTET2-treated conditions within all TET2 peaks. \*\*\*\* =  $p \leq 0.0001$ . C) Average plot showing normalised signal enrichment of TET2 ChIP-seq under siNT or siTET2-treated conditions within all TET2 peaks. TET2 knockdown was performed for 48 hours. ChIPs were performed in biological triplicate. D) PRM results showing levels of a single unique ER peptide (left) or multiple TET2 peptides (right) in response to vehicle (ethanol, 3 hours) or fulvestrant (100 nM, 3 hours). Results represent mean  $\pm$  SD peptide levels relative to an actin control (n = 4). \*\* =  $p \leq 0.01$ , \*\*\*\* =  $p \leq 0.0001$ . E) ChIP-qPCR results showing reduction of ER chromatin occupancy in response to treatment with vehicle (ethanol, 3 hours) or fulvestrant (100 nM, 3 hours) at several key ER binding sites. Results represent mean  $\pm$  SD, n = 4. \* =  $p \leq 0.05$ , \*\* =  $p \leq 0.01$ , \*\*\* =  $p \leq 0.001$ . F) Principal component analysis (PCA) plot demonstrating consistency between fulvestrant and vehicle-treated TET2 ChIP-seq replicate samples.

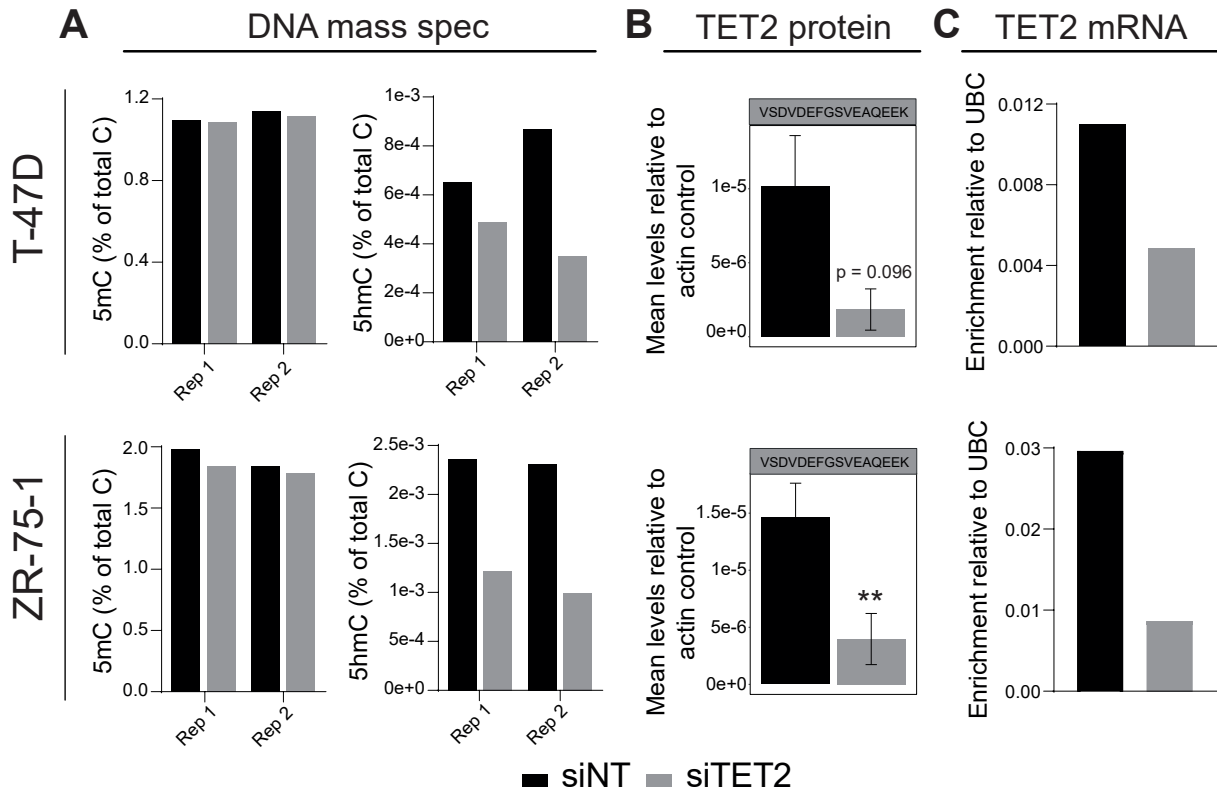

**Figure S6. TET2 knockdown in T-47D and ZR-75-1 cells induces a global drop in 5hmC levels, but no change in overall 5mC levels (related to Figure 6).** A) Mass spectrometry was used to assess global levels of 5mC (left) or 5hmC (right) in DNA isolated from T-47D cells or ZR-75-1 cells treated for 72 hours with either non-targeting control siRNA (siNT) or siRNA targeting TET2 (siTET2). Measurements from two independent biological replicates are plotted separately. Results are expressed as % of total cytosines. B) PRM results showing levels of the TET2 peptide VSDVDEFGSVEAQEEK in response to siNT or siTET2 treatment (72 hours) in T-47D cells (top) and ZR-75-1 cells (bottom). Results represent mean  $\pm$  SD peptide levels relative to an actin control (n = 3). \*\* =  $p \leq 0.01$ . C) To validate the TET2 knockdown further, TET2 mRNA levels in T-47D cells (top) and ZR-75-1 cells (bottom) in response to siNT or siTET2 treatment (48 hours) were assessed using qRT-PCR. Data are expressed as enrichment relative to a housekeeping control gene (UBC) (n = 1, mean of three technical replicates).
